# Multifrequency VLBI Observations of the Broad Absorption Line Quasar J1020+4320: Recently Restarted Jet Activity?

Akihiro DOI,<sup>1,2</sup> Yasuhiro MURATA,<sup>1,2</sup> Nanako MOCHIZUKI,<sup>1</sup> Hiroshi TAKEUCHI,<sup>1</sup> Keiichi ASADA,<sup>3</sup> Takayuki J. HAYASHI,<sup>4,5</sup>  
Hiroshi NAGAI,<sup>6</sup> Katsunori M. SHIBATA,<sup>4</sup> Tomoaki OYAMA,<sup>4</sup> Takaaki JIKE,<sup>4</sup> Kenta FUJISAWA,<sup>7,8</sup> Koichiro SUGIYAMA,<sup>9</sup>  
Hideo OGAWA,<sup>10</sup> Kimihiro KIMURA,<sup>10</sup> Mareki HONMA,<sup>4,11</sup> Hideyuki KOBAYASHI,<sup>4,5</sup> and Shoko KOYAMA<sup>4,5</sup>

<sup>1</sup>*The Institute of Space and Astronautical Science, Japan Aerospace Exploration Agency,  
3-1-1 Yoshinodai, Chuou-ku, Sagami-hara 229-8510*

<sup>2</sup>*Department of Space and Astronautical Science, The Graduate University for Advanced Studies,  
3-1-1 Yoshinodai, Chuou-ku, Sagami-hara 229-8510*

<sup>3</sup>*Academia Sinica Institute of Astronomy and Astrophysics, P.O. Box 23-141, Taipei 10617, Taiwan*

<sup>4</sup>*Mizusawa VLBI Observatory, National Astronomical Observatory of Japan, 2-21-1 Osawa, Mitaka, Tokyo 181-8588*

<sup>5</sup>*Department of Astronomy, The University of Tokyo, 7-3-1 Hongo, Bunkyo-ku, Tokyo 113-0033*

<sup>6</sup>*National Astronomical Observatory of Japan, 2-21-1 Osawa, Mitaka, Tokyo 181-8588*

<sup>7</sup>*Department of Physics, Faculty of Science, Yamaguchi University, Yoshida 1677-1, Yamaguchi, Yamaguchi 753-8512*

<sup>8</sup>*The Research Institute for Time Studies, Yamaguchi University, Yoshida 1677-1, Yamaguchi, Yamaguchi 753-8511*

<sup>9</sup>*Graduate school of Science and Engineering, Yamaguchi University, 1677-1 Yoshida, Yamaguchi, Yamaguchi 753-8512*

<sup>10</sup>*Department of Physical Science, Osaka Prefecture University, 1-1 Gakuen-cho, Naka-ku, Sakai 599-8531*

<sup>11</sup>*Department of Astronomical Science, Graduate University for Advanced Studies, 2-21-1 Osawa, Mitaka, Tokyo 181-8588*

(Received 2012 November 17; accepted 2012 December 31)

## Abstract

This paper reports on very-long-baseline interferometry observations of the radio-loud broad absorption line (BAL) quasar J1020+4320 at 1.7, 2.3, 6.7, and 8.4 GHz using the Japanese VLBI network (JVN) and European VLBI network (EVN). The radio morphology is compact with a size of  $\sim 10$  pc. The convex radio spectrum has been stable over the last decade; an observed peak frequency of 3.2 GHz is equivalent to 9.5 GHz in the rest frame, suggesting an age on the order of  $\sim 100$  years as a radio source, according to an observed correlation between the linear size and the peak frequency of compact steep spectrum (CSS) and giga-hertz peaked spectrum (GPS) radio sources. A low-frequency radio excess suggests a relic of past jet activity. J1020+4320 may be one of the quasars with recurrent and short-lived jet activity during a BAL-outflowing phase.

**Key words:** galaxies: active — galaxies: jets — galaxies: quasars: absorption lines — galaxies: quasars: individual (SDSS J102027.20+432056.2) — radio continuum: galaxies

## 1. Introduction

Broad absorption line (BAL) quasars are identified in rest-frame ultraviolet spectra by broad absorption troughs displaced blueward from the corresponding emission lines, such as C IV and Mg II (Weymann et al. 1991). The blueward displacements, sometimes up to  $\sim 0.2c$ , are attributed to intervening outflows from active galactic nuclei (AGNs) in our line of sight. The intrinsic percentage of quasars with BALs is  $\sim 20\%$  (Hewett & Foltz 2003; Knigge et al. 2008). Two plausible explanations, an orientation scheme and an evolutionary scheme, were proposed and have been long debated. The orientation scheme proposes that the outflowing BAL wind is preferentially equatorial (Murray et al. 1995; Proga et al. 2000), and can be observed as absorption troughs only when the accretion disk is viewed nearly edge-on. The evolutionary scheme proposes that BAL outflows are associated with a relatively short-lived (possibly episodic) evolutionary phase (Gregg et al. 2000, 2006).

Radio observations offer several inclination indicators and

age estimators that can be used to test these two controversial schemes for BAL quasars (Stocke et al. 1992; Richards et al. 2001; Menou et al. 2001; Brotherton et al. 2006; DiPompeo et al. 2012 and references as follows). Several radio sources in BAL quasars exhibit rapid radio variability that indicates unusually high brightness temperatures, which requires Doppler beaming of nearly pole-on viewed jets, i.e., accretion disks with small inclinations (Zhou et al. 2006; Ghosh & Punsly 2007). A wide range of spectral indices, including flat spectra and steep spectra, is consistent with the wide range of orientations (Becker et al. 2000; Montenegro-Montes et al. 2008; Fine et al. 2011). Although there is weak evidence that the spectral indices of BAL quasars are steeper than those of non-BAL quasars, which mildly favor edge-on orientations (DiPompeo et al. 2011; Bruni et al. 2012), a single edge-on geometry cannot describe all BAL quasars. Becker et al. (2000) suggested a picture in which BAL quasars represent an early stage in the development of quasars on the basis of their compact radio morphology, observed in most cases. Montenegro-Montes et al. (2008) demonstrated that

**Table 1.** List of observations.\*

| $\nu$<br>(GHz)<br>(1) | Date<br>(2) | Array<br>(3) | Antenna<br>(4)          |
|-----------------------|-------------|--------------|-------------------------|
| 1.666                 | 2008 Mar 02 | MERLIN       | MK LO CA DE KN DA TA    |
| 1.658                 | 2008 Mar 02 | EVN          | LO Wb Ef On Mc Tr CA Nt |
| 2.272                 | 2008 Aug 17 | JVN          | VERA×4 Ud               |
| 6.672                 | 2008 May 04 | JVN          | VERA×4 Ud YM            |
| 8.408                 | 2008 Aug 17 | JVN          | VERA×4 Ud Uc Ks         |

\* Col. (1) center frequency; Col. (2) observation date; Col. (3) array; Col. (4) participating antenna. MK: Mark 2 32 × 25 m, LO: Lovell 76 m, CA: Cambridge 32 m, DE: Defford 25 m, KN: Knocking 25 m, DA: Darnhall 25 m, TA: Tabley 25 m, Wb: Westerbork, Ef: Effelsberg 100 m, On: Onsala 85 m, Mc: Medicina 32 m, Tr: Torun 32 m, Nt: Noto 32 m, VERA: VLBI Exploration of Radio Astrometry (VERA) 20 m, Ud: JAXA Usuda 64 m, YM: Yamaguchi 32 m, Uc: JAXA Uchinoura 34 m, Ks: Kashima 34 m.

many radio-emitting BAL quasars share several radio properties common to young radio sources, such as gigahertz-peaked spectrum (GPS) and compact steep spectrum (CSS) sources. GPS sources are compact ( $\lesssim 1$  kpc), and show a convex radio spectrum that peaks between 500 MHz and 10 GHz; CSS sources are larger ( $\sim 1$ –20 kpc) and have convex spectra that tend to peak at lower frequencies, typically  $< 500$  MHz (O’Dea 1998). On the basis of the rarity of Fanaroff-Riley Class II radio galaxies in BAL quasars and their observed anticorrelation between the balnicity index and radio loudness, Gregg, Becker, and de Vries (2006) suggested a model in which a BAL phase evolves into a radio-loud phase with a relatively short overlap. In this context, AGN wind-induced feedback in the early stages of radio source evolution is discussed concerning the galaxy–black hole coevolution (e.g., L  pari & Terlevich 2006; Holt et al. 2008). On the other hand, Bruni et al. (2012) reported that the fractions of GPS candidates are similar in their BAL and non-BAL quasar samples, suggesting that BAL quasars are generally not younger than non-BAL quasars. Thus, neither the orientation scheme nor the evolutionary scheme has been conclusively demonstrated to date on the basis of these inclination indicators and age estimators.

Very-long-baseline interferometry (VLBI) with milliarc-second (mas) angular resolution provides exclusive and crucial opportunities for investigating of the parsec (pc)-scale regions in which the phenomena that these inclination indicators and age estimators rely on are actually occurring. Several VLBI observations have been reported for BAL-quasar radio sources (Jiang & Wang 2003; Kunert-Bajraszewska & Marecki 2007; Kunert-Bajraszewska et al. 2010; Liu et al. 2008; Doi et al. 2009; Reynolds et al. 2009; Montenegro Montes et al. 2009; Gawronski & Kunert-Bajraszewska 2010; Yang et al. 2012; Hayashi et al. 2013). These revealed various signatures, such as blazar-like jets with a one-sided morphology, polarized radio emissions, a two-sided morphology suggesting inclined jets, CSS-like characteristics, and interactions between the interstellar medium and the jet. Doi et al. (2009) reported on their systematic VLBI detection survey at 8.4 GHz for 22 radio-loud BAL quasars using the Optically ConnecTed Array for VLBI Exploration project (OCTAVE: Kawaguchi 2008). The samples of bright radio sources ( $> 100$  mJy beam $^{-1}$ ) were

**Table 2.** Results of observations.\*

| $\nu$<br>(GHz)<br>(1) | $S_\nu$<br>(mJy)<br>(2) | $\sigma$<br>(mJy beam $^{-1}$ )<br>(3) | $\theta_{\text{maj}} \times \theta_{\text{min}}$<br>(mas × mas)<br>(4) | $PA$<br>( $^\circ$ )<br>(5) |
|-----------------------|-------------------------|----------------------------------------|------------------------------------------------------------------------|-----------------------------|
| 1.666I                | 193 ± 19                | 0.4                                    | 136.6 × 188.7                                                          | 48                          |
| 1.658I                | 164 ± 16                | 1.1                                    | 26.6 × 21.3                                                            | −87                         |
| 2.272R                | 330 ± 34                | 3.7                                    | 16.1 × 9.2                                                             | −61                         |
| 6.672L                | 252 ± 26                | 2.7                                    | 6.0 × 3.1                                                              | −69                         |
| 8.408R                | 206 ± 21                | 1.2                                    | 5.4 × 3.3                                                              | −52                         |

\* Col. (1) center frequency. “L” denotes left circular polarization, “R” denotes right circular polarization, and “I” denotes dual circular polarization; Col. (2) flux density; Col. (3) image rms noise; Col. (4) Half-power beam width; Col. (5) position angle of major axis of beam width.

selected by position matching between the BAL quasar catalog of Trump et al. (2006) from the Sloan Digital Sky Survey Third Data Release (SDSS DR3: Abazajian et al. 2005) and Faint Images of the Radio Sky at Twenty-cm (FIRST: Becker et al. 1995). Most sources (20/22) were detected with the OCTAVE baselines, suggesting brightness temperatures of greater than  $10^5$  K, and the simultaneous coexistence of BAL outflows and nonthermal jets. Four sources exhibited inverted spectra, suggesting blazars with pole-on-viewed relativistic jets, or GPS sources as young radio sources.

In the present paper, we report on multifrequency VLBI observations of the BAL quasar J1020+4320 (SDSS J102027.20+432056.2 at  $z = 1.962$ ), which was one of the four radio sources showing inverted spectra in the OCTAVE study. J1020+4320 exhibits BAL troughs exhibiting an average velocity of  $21341$  km s $^{-1}$  with a width of  $1168$  km s $^{-1}$ ; such a broad width is attributed to an intrinsic absorption. The absorption index (AI: Hall et al. 2002) is  $716$  km s $^{-1}$ , according to a modified definition of the AI by Trump et al. (2006). On the other hand, the balnicity index (BI: Weymann et al. 1991) is 0 (Gibson et al. 2009), according to the criterion of a velocity width  $> 2000$  km s $^{-1}$  according to the BI definition. J1020+4320 is a compact radio source in the FIRST image with a resolution of  $\sim 5''$ . Previous

radio observations in arcsec/arcmin resolutions (Marecki et al. 1999; Vollmer et al. 2008; Orienti et al. 2010; Stanghellini et al. 2009) suggested that J1020+4320 is a candidate for a high-frequency peaker (HFP; Dallacasa et al. 2000, with a spectral peak occurring at frequencies above a few GHz), which is considered to be a younger subclass in the GPS population. The present paper is organized as follows. In section 2, our observations and data-reduction procedures are described. The observational results are presented in section 3, and their implications are discussed in section 4. Throughout this paper, a  $\Lambda$ CDM cosmology with  $H_0 = 70.5 \text{ km s}^{-1} \text{ Mpc}^{-1}$ ,  $\Omega_M = 0.27$ , and  $\Omega_\Lambda = 0.73$  is adopted (Komatsu et al. 2009). The comoving distance is 5225 Mpc; 1 milliarcsecond (mas) corresponds to 8.6 pc at the distance from J1020+4320.

## 2. Observations and Data Reduction

VLBI observations at 1.7, 2.3, 6.7, and 8.4 GHz were conducted during a half-year period in 2008 (table 1). J1020+4320 was observed at 1.7 GHz using the European VLBI Network (EVN) and the Multi-Element Radio Linked Interferometer Network (MERLIN) simultaneously in the snapshot mode. Left- and right-circular-polarization signals with a total bandwidth of 32 MHz each for the EVN and 16 MHz each for the MERLIN were obtained; only Stokes-I correlations were used in this study. Observations at 2.3, 6.7, and 8.4 GHz using the Japanese VLBI Network (JVN; Fujisawa 2008) were conducted in single circular polarization at a data recording rate of 64 Mbps with 2-bit quantization; this provided an observing band-width of 16 MHz for each band. The data at 2.3 and 8.4 GHz were obtained simultaneously. Correlation processing was performed using the Mitaka FX correlator (Shibata et al. 1998) at the National Astronomical Observatory of Japan (NAOJ).

Data reduction was performed using the Astronomical Image Processing System (AIPS; Greisen 2003). For the EVN data at 1.7 GHz, amplitude calibration, bandpass calibration, flagging, and fringe-fitting were performed in the standard manner. The assumed uncertainty of the amplitude calibration is 10%. For the JVN data at 2.3, 6.7, and 8.4 GHz, a-priori amplitude calibration was not used because of the lack of a monitoring system of system-noise temperature of several antennas at that time. The amplitude-gain parameters relative to each antenna were obtained from the self-calibration solution for a point-like strong source, J0958+4725, which was near the target in the sky and was scanned every several tens of minutes to monitor the time variation in the system equivalent flux density (SEFD) of each antenna. The amplitude scaling factor was based on the total flux density of OJ 287, which was measured with the Very Large Array (VLA) at 8.4 GHz within one week of the JVN observations and Usuda 64-m single-dish observations at 2.3, 6.7, and 8.4 GHz during the JVN observations. Flux scaling was performed by comparing the self-calibration solutions on the scans of OJ 287<sup>1</sup> and J0958+4725 at nearly the same elevation; a structure model

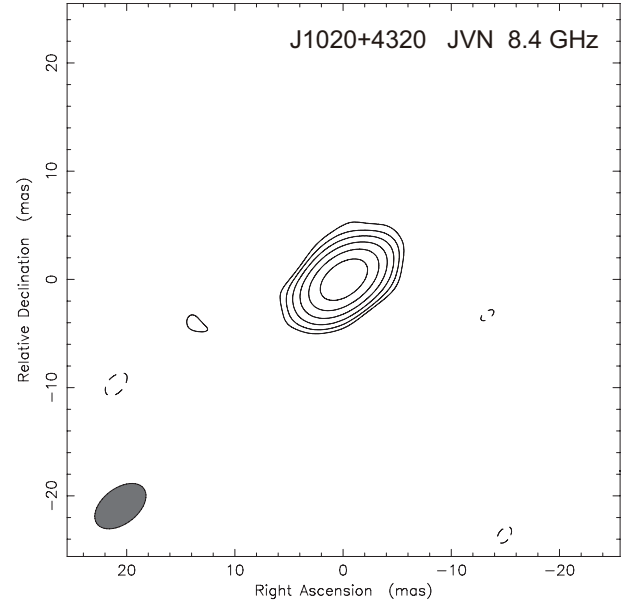

**Fig. 1.** JVN image at 8.4 GHz. Contour levels are  $-1, 1, 2, 4, 8, 16$ , and  $32$  times  $3\sigma$  of the image rms noise ( $\sigma = 1.2 \text{ mJy beam}^{-1}$ ).

obtained using the Very Long Baseline Array (VLBA) was used for the self-calibration of OJ 287. Although the structure of OJ 287 is known to be variable, it can be assumed to be stable in the range of JVN baselines (less than  $50 M\lambda$  at 8.4 GHz). As a check, we found that an amplitude scaling factor obtained from auto-correlation data for methanol masers, whose flux density was determined by a single-dish observation with the Yamaguchi 32 m, showed only a 4% difference from the OJ 287-based scaling factor (Sugiyama et al. 2011). In addition, the flux scaling factor was approximately equal to the factors (with a scattering of less than 10%) obtained by several other JVN observations (Doi et al. 2006, 2007; Tsuboi et al. 2008; Sudou & Edwards 2009; Niinuma et al. 2012). We assumed that the uncertainty of the flux densities for our JVN observations is also 10%. Imaging was performed using the Difmap software (Shepherd et al. 1994) to apply iteratively deconvolution and self-calibration procedures.

## 3. Results

### 3.1. Radio Morphology

J1020+4320 is nearly unresolved in all of our VLBI images at 1.7, 2.3, 6.7, and 8.4 GHz; the measured total flux densities are listed in table 2. At 8.4 GHz (figure 1), the deconvolved size determined using the AIPS task JMFIT in the image domain<sup>2</sup> is  $0.6 \pm 0.2 \text{ mas}$  at a position angle ( $PA$ ) of  $PA = 87^\circ \pm 55^\circ$  and an axis ratio of  $\lesssim 0.1$ , suggesting an elongated structure of  $\sim 5 \text{ pc}$ . We also analyzed archival data from the VLBA Imaging and Polarimetry Survey (VIPS; Helmboldt et al. 2007) at 5 GHz, and measured the deconvolved size to be  $1.1 \text{ mas}$  elongated at  $PA = 67^\circ$ , which is consistent with the JVN result. The difference in the flux density between

<sup>1</sup> OJ 287 is one of the rare objects for which almost all of the total flux density can be retrieved at the shortest VLBI baselines according to comparisons between the VLBI correlated flux densities and the total flux densities in the VLA and single-dish monitoring (UMRAO) for many years.

<sup>2</sup> We obtained nearly the same result using the visibility-based model fit in Difmap.

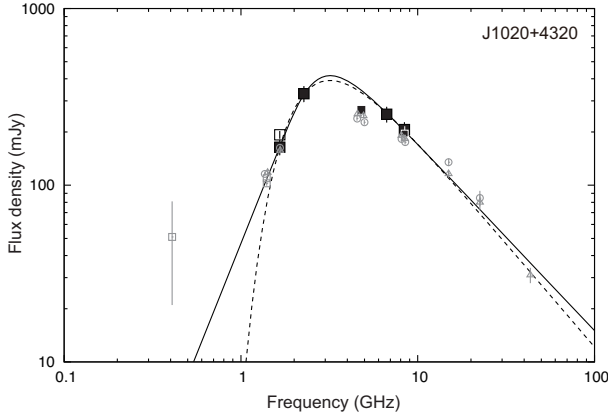

**Fig. 2.** Radio spectrum of J1020+4320. Large filled squares and a large open square: our VLBI and MERLIN measurements, respectively, in 2008. Small filled squares: OCTAVE at 8.4 GHz on 2007 November 04 (Doi et al. 2009) and VIPS at 5 GHz on 2006 May 01 (Helmholtz et al. 2007). Small open circles: quasi-simultaneous VLA on 1999 June 25 (Stanghellini et al. 2009). Small open triangles: quasi-simultaneous VLA in 2004 January (Oriente et al. 2010). Small open squares: NVSS on 1993 November 15 (Condon et al. 1998) and FIRST on 1997 February 20 (Becker et al. 1995) at 1.4 GHz and MERLIN at 408 MHz from 1994 November to 1995 January (Marecki et al. 1999). Solid and dashed curves indicate spectra fitted to our four-frequency VLBI data (large filled squares) with spectral models of synchrotron self-absorption and free-free absorption, respectively (subsection 3.2).

(simultaneous) MERLIN and EVN observations at 1.7 GHz was  $29 \pm 19$  mJy, which was minor ( $\sim 15\%$ ) compared to the total emission (193 mJy). Thus, most of the emission is concentrated in a central region within  $\sim 25$  mas (the beam size of EVN), corresponding to  $\sim 200$  pc. An unresolved structure in the MERLIN image constrains the entire size to  $< 190$  mas, corresponding to  $< 1.6$  kpc.

### 3.2. Radio Spectrum

Our VLBI results suggest a spectrum with a turnover (figure 2). We applied spectral fitting to *only* our 2008 VLBI data at four frequencies (see tables 1 and 2). A simple power-law spectral model including synchrotron self-absorption (SSA),  $S_\nu = S_0 \nu^{2.5} [1 - \exp(-\tau \nu^{\alpha_0 - 2.5})]$ , provided a peak flux density of  $S_p = 417$  mJy at a peak frequency of  $\nu_p = 3.2$  GHz with  $\alpha_0 = -1.1$ . A spectral model including free-free absorption (FFA),  $S_\nu = S_0 \nu^{\alpha_0} \exp(-\tau \nu^{-2.1})$ , provided  $S_p = 392$  mJy at  $\nu_p = 3.2$  GHz<sup>3</sup> with  $\alpha_0 = -1.2$ . Although these spectral fittings were unable to discriminate conclusively between SSA and FFA, peak frequencies of  $\nu_p = 3.2$  GHz are suggested in either case.

### 3.3. Variability

Our VLBI measurements and the two fitted spectra are in good agreement with previous studies (small symbols

in figure 2), even those with different beam sizes. Therefore, J1020+4320 is a compact and stable radio source without significant variability over the last decade.

## 4. Discussion

The observational results confirmed a series of characteristics corresponding to a young radio source: (1) compact morphology, (2) a giga-hertz peaked spectrum, and (3) little variability (O’Dea 1998 for a review). Therefore, we conclude that the BAL quasar J1020+4320 possesses a young radio source at its nucleus.

The determined spectral peak frequency of 3.2 GHz in the observer frame is equivalent to a peak at 9.5 GHz in the rest frame at  $z = 1.962$ . The age estimator based on the observed correlation between the linear size and the peak frequency of CSS and GPS radio sources (O’Dea & Baum 1997; Snellen et al. 2000) indicates that the radio source in J1020+4320 might be extremely young with an age on the order of  $\sim 100$  years ( $\sim 10$  pc in size at a tentative expansion velocity of  $\sim 0.3c$ ; see O’Dea & Baum 1997). Indeed, the marginally deconvolved structure with an elongation of  $\sim 1$  mas in the JVN 8.4-GHz and VIPS 5-GHz images (subsection 3.1) is suggestive of a mini radio galaxy of  $\sim 10$  pc across. Alternatively, the result of an SSA spectral fitting suggests a source diameter on the order of  $\sim 10$  pc (with a magnetic field of  $\sim 0.1$  G) under the near equipartition condition between the energy densities of radiating electrons and the magnetic field in a homogeneous, self-absorbed, incoherent synchrotron radio source with a power-law electron energy distribution. This linear size is also consistent with our VLBI images. Thus, we can naturally understand the observed radio properties of J1020+4320 in terms of its compactness (with a size of  $\sim 10$  pc). To confirm that the radio source is actually young, further investigations might be essential for determining its kinematic age by, e.g., measuring expected spectral changes on the spectral property undergoing adiabatic expansion (Oriente et al. 2010).

On the other hand, the data point at 408 MHz ( $51 \pm 30$  mJy with MERLIN; Marecki et al. 1999) is significantly distant from our fitted model spectra. More than one component is necessary to fit the low-frequency emission. It may originate in an optically thin component at large scales with a steep spectrum, which can also be inferred from the observed  $29 \pm 19$  mJy at 1.7 GHz (the MERLIN–EVN differential flux density) from the region of  $\sim 0.2$ – $1.6$  kpc (subsection 3.1). The low-frequency component could be conceivably explained as being a relic of past jet activity (Baum et al. 1990; Saikia & Jamroz 2009, and references therein). In the case of J1020+4320, the age of the GPS component is  $\sim 100$  years, while the low-frequency component may be a relic of jets emanated  $\sim (0.7\text{--}5) \times 10^4$  years ago (assuming an expansion rate of  $0.1c$ ). The coexistence of components with distinct ages indicates recurrent jet activity. The current stage of 3C 84 may be the closest example for the restarted jet activity in the recent 100 years in an existing radio galaxy (Asada et al. 2006; Nagai et al. 2009, 2010); the classical double-lobed radio galaxy 1245+676 also contains a GPS component of an expanding compact double with a separation of 14 pc,

<sup>3</sup> The spectral peak frequencies of J1020+4320 have been determined to be  $\sim 1$ – $5$  GHz in a series of previous studies as well (Marecki et al. 1999; Vollmer et al. 2008; Stanghellini et al. 2009; Oriente et al. 2010), which are consistent with our fitting results. These minor discrepancies are attributed to their different model functions, (such as a broken power-law, hyperbola, and parabola) which do not have any direct physical significance.

suggesting a kinematic age of  $\sim 200$  years (Marecki et al. 2003). Similarly, J1020+4320 may not be as young as a radio source, but contains a very young radio component originating in the restarted jet activity.

Composite spectra with GPS and MHz components have been found in a portion of radio-loud BAL quasars (Montenegro-Montes et al. 2008; Bruni et al. 2012) as well as J1020+4320. The fact that the restarted jets are associated with BAL features suggests relevance to the evolutionary scheme for the origin of BAL quasars. In the evolutionary scheme, the BAL fraction in the quasar population ( $\sim 20\%$ : e.g., Hewett & Foltz 2003; Knigge et al. 2008) requests the duration of the BAL phase to be  $\sim 2 \times 10^7$  years for the AGN lifetime of  $\sim 10^8$  years. On the other hand, time scales of  $\sim 10^6$  years for the intermission of the jet have been inferred in several double-double radio galaxies, such as PKS B1545–321 (Safouris et al. 2008), 4C 02.27 (Jamrozy et al. 2009), B1834+620 (Schoenmakers et al. 2000), and Cygnus A (Steenbrugge et al. 2008), although various different time scales have also been inferred from existing observations (Saikia & Jamrozy 2009 for a review). Thus, because the time scale between successive episodes of the jet activity are possibly much shorter than the BAL phase, short-lived GPS sources may appear repeatedly during the BAL phase. J1020+4320 may be one of the quasars with a recently reactivated jet during a BAL phase. At this stage, our study on a quasar in the BAL–GPS composite phase constitutes the first step toward additional extensive research, rather than conclusive evidence for the relationship between the processes initiating/interrupting BAL outflow and a nonthermal jet for the galaxy–black hole coevolution.

We thank the anonymous referee for constructive suggestions that improved the clarity of this paper. We are grateful

to all staff members and students involved in the development and operation of the Japanese VLBI network (JVN). The JVN project is led by the National Astronomical Observatory of Japan (NAOJ), which is a branch of the National Institutes of Natural Sciences (NINS), Yamaguchi University, Hokkaido University, Gifu University, Kagoshima University, Tsukuba University, Osaka Prefecture University, and Ibaraki University, in collaboration with the Geographical Survey Institute (GSI), the Japan Aerospace Exploration Agency (JAXA), and the National Institute of Information and Communications Technology (NICT). The observations on 2008 August 17, in this study was the first astronomical VLBI observation for the JAXA Uchinoura 34 m antenna. MERLIN is operated by the University of Manchester as a National Facility of the Science and Technology Facilities Council (STFC). The European VLBI Network is a joint facility of European, Chinese and other radio astronomy institutes funded by their national research councils. We used the US National Aeronautics and Space Administration's (NASA) Astrophysics Data System (ADS) abstract service and NASA/IPAC Extragalactic Database (NED), which is operated by the Jet Propulsion Laboratory (JPL). In addition, we used the Astronomical Image Processing System (AIPS) software developed at the National Radio Astronomy Observatory (NRAO), a facility of the National Science Foundation operated under cooperative agreement by Associated Universities, Inc. This research has made use of data from the University of Michigan Radio Astronomy Observatory, which has been supported by the University of Michigan and by a series of grants from the National Science Foundation, most recently AST-0607523. This study was partially supported by Grants-in-Aid for Scientific Research (C: 21540250 and B: 24340042, AD) from the Japan Society for the Promotion of Science (JSPS).

## References

- Abazajian, K., et al. 2005, *AJ*, 129, 1755  
 Asada, K., Kamenno, S., Shen, Z.-Q., Horiuchi, S., Gabuzda, D. C., & Inoue, M. 2006, *PASJ*, 58, 261  
 Baum, S. A., O'Dea, C. P., Murphy, D. W., & de Bruyn, A. G. 1990, *A&A*, 232, 19  
 Becker, R. H., White, R. L., Gregg, M. D., Brotherton, M. S., Laurent-Muehleisen, S. A., & Arav, N. 2000, *ApJ*, 538, 72  
 Becker, R. H., White, R. L., & Helfand, D. J. 1995, *ApJ*, 450, 559  
 Brotherton, M. S., De Breuck, C., & Schaefer, J. J. 2006, *MNRAS*, 372, L58  
 Bruni, G., et al. 2012, *A&A*, 542, A13  
 Condon, J. J., Cotton, W. D., Greisen, E. W., Yin, Q. F., Perley, R. A., Taylor, G. B., & Broderick, J. J. 1998, *AJ*, 115, 1693  
 Dallacasa, D., Stanghellini, C., Centonza, M., & Fanti, R. 2000, *A&A*, 363, 887  
 DiPompeo, M. A., Brotherton, M. S., & De Breuck, C. 2012, *ApJ*, 752, 6  
 DiPompeo, M. A., Brotherton, M. S., De Breuck, C., & Laurent-Muehleisen, S. 2011, *ApJ*, 743, 71  
 Doi, A., et al. 2006, *PASJ*, 58, 777  
 Doi, A., et al. 2007, *PASJ*, 59, 703  
 Doi, A., et al. 2009, *PASJ*, 61, 1389  
 Fine, S., Jarvis, M. J., & Mauch, T. 2011, *MNRAS*, 412, 213  
 Fujisawa, K. 2008, in *Proc. 9th European VLBI Network Symp.*, POS (IX EVN Symposium) (Trieste: SISSA), 75  
 Gawroński, M. P., & Kunert-Bajraszewska, M. 2010, in *Proc. 10th European VLBI Network Symp.*, POS (IX EVN Symposium) (Trieste: SISSA), 37  
 Ghosh, K. K., & Punsly, B. 2007, *ApJ*, 661, L139  
 Gibson, R. R., et al. 2009, *ApJ*, 692, 758  
 Gregg, M. D., Becker, R. H., Brotherton, M. S., Laurent-Muehleisen, S. A., Lacy, M., & White, R. L. 2000, *ApJ*, 544, 142  
 Gregg, M. D., Becker, R. H., & de Vries, W. 2006, *ApJ*, 641, 210  
 Greisen, E. W. 2003, in *Information Handling in Astronomy - Historical Vistas*, ed. A. Heck (Dordrecht: Kluwer), 109  
 Hall, P. B., et al. 2002, *ApJS*, 141, 267  
 Hayashi, J. T., Doi, A., & Nagai, H. 2013, *ApJ* submitted  
 Helmboldt, J. F., et al. 2007, *ApJ*, 658, 203  
 Hewett, P. C., & Foltz, C. B. 2003, *AJ*, 125, 1784  
 Holt, J., Tadhunter, C. N., & Morganti, R. 2008, *MNRAS*, 387, 639  
 Jamrozy, M., Saikia, D. J., & Konar, C. 2009, *MNRAS*, 399, L141  
 Jiang, D. R., & Wang, T. G. 2003, *A&A*, 397, L13  
 Kawaguchi, N. 2008, in *Proc. 9th European VLBI Network Symp.*, POS (IX EVN Symposium) (Trieste: SISSA), 41  
 Knigge, C., Scaringi, S., Goad, M. R., & Cottis, C. E. 2008, *MNRAS*, 386, 1426

- Komatsu, E., et al. 2009, *ApJS*, 180, 330
- Kunert-Bajraszewska, M., Janiuk, A., Gawroński, M. P., & Siemiginowska, A. 2010, *ApJ*, 718, 1345
- Kunert-Bajraszewska, M., & Marecki, A. 2007, *A&A*, 469, 437
- Lípari, S. L., & Terlevich, R. J. 2006, *MNRAS*, 368, 1001
- Liu, Y., Jiang, D. R., Wang, T. G., & Xie, F. G. 2008, *MNRAS*, 391, 246
- Marecki, A., Barthel, P. D., Polatidis, A., & Owsianik, I. 2003, *Publ. Astron. Soc. Aust.*, 20, 16
- Marecki, A., Falcke, H., Niezgoda, J., Garrington, S. T., & Patnaik, A. R. 1999, *A&AS*, 135, 273
- Menou, K., et al. 2001, *ApJ*, 561, 645
- Montenegro Montes, F. M., Mack, K. H., Benn, C. R., Carballo, R., Dallacasa, D., González-Serrano, J. I., Holt, J., & Jiménez-Luján, F. 2009, in *Proc. 9th European VLBI Network Symp., POS (IX EVN Symposium) (Trieste: SISSA)*, 19
- Montenegro-Montes, F. M., Mack, K.-H., Vigotti, M., Benn, C. R., Carballo, R., González-Serrano, J. I., Holt, J., & Jiménez-Luján, F. 2008, *MNRAS*, 388, 1853
- Murray, N., Chiang, J., Grossman, S. A., & Voit, G. M. 1995, *ApJ*, 451, 498
- Nagai, H., et al. 2010, *PASJ*, 62, L11
- Nagai, H., Asada, K., Doi, A., Kamenno, S., & Inoue, M. 2009, *Astron. Nachr.*, 330, 161
- Niinuma, K., et al. 2012, *ApJ*, 759, 84
- O'Dea, C. P. 1998, *PASP*, 110, 493
- O'Dea, C. P., & Baum, S. A. 1997, *AJ*, 113, 148
- Orienti, M., Dallacasa, D., & Stanghellini, C. 2010, *MNRAS*, 408, 1075
- Proga, D., Stone, J. M., & Kallman, T. R. 2000, *ApJ*, 543, 686
- Reynolds, C., Punsly, B., Kharb, P., O'Dea, C. P., & Wrobel, J. 2009, *ApJ*, 706, 851
- Richards, G. T., Laurent-Muehleisen, S. A., Becker, R. H., & York, D. G. 2001, *ApJ*, 547, 635
- Safouris, V., Subrahmanyam, R., Bicknell, G. V., & Saripalli, L. 2008, *MNRAS*, 385, 2117
- Saikia, D. J., & Jamrozy, M. 2009, *Bull. Astron. Soc. India*, 37, 63
- Schoenmakers, A. P., de Bruyn, A. G., Röttgering, H. J. A., & van der Laan, H. 2000, *MNRAS*, 315, 395
- Shepherd, M. C., Pearson, T. J., & Taylor, G. B. 1994, *Bull. Am. Astron. Soc.*, 26, 987
- Shibata, K. M., Kamenno, S., Inoue, M., & Kobayashi, H. 1998, in *ASP Conf. Ser.*, 144, *IAU Colloq. 164, Radio Emission from Galactic and Extragalactic Compact Sources*, ed. J. A. Zensus et al. (San Francisco: ASP), 413
- Snellen, I. A. G., Schilizzi, R. T., Miley, G. K., de Bruyn, A. G., Bremer, M. N., & Röttgering, H. J. A. 2000, *MNRAS*, 319, 445
- Stanghellini, C., Dallacasa, D., & Orienti, M. 2009, *Astron. Nachr.*, 330, 223
- Steenbrugge, K. C., Blundell, K. M., & Duffy, P. 2008, *MNRAS*, 388, 1465
- Stoeck, J. T., Morris, S. L., Weymann, R. J., & Foltz, C. B. 1992, *ApJ*, 396, 487
- Sudou, H., & Edwards, P. G. 2009, in *ASP Conf. Ser.*, 402, *Approaching Micro-Arcsecond Resolution with VSOP-2: Astrophysics and Technologies*, ed. Y. Hagiwara et al. (San Francisco: ASP), 233
- Sugiyama, K., et al. 2011, *PASJ*, 63, 53
- Trump, J. R., et al. 2006, *ApJS*, 165, 1
- Tsuboi, M., et al. 2008, *PASJ*, 60, 465
- Vollmer, B., Krichbaum, T. P., Angelakis, E., & Kovalev, Y. Y. 2008, *A&A*, 489, 49
- Weymann, R. J., Morris, S. L., Foltz, C. B., & Hewett, P. C. 1991, *ApJ*, 373, 23
- Yang, J., Wu, F., Paragi, Z., & An, T. 2012, *MNRAS*, 419, L74
- Zhou, H., Wang, T., Wang, H., Wang, J., Yuan, W., & Lu, Y. 2006, *ApJ*, 639, 716
